# Supplementary material
Source: PubMed Central journal article supplement (PMC8184521)
Supplement: mmc1.pdf [file mmc1.pdf]

iScience, Volume 24

## **Supplemental information**

### **Phenome-wide and expression quantitative trait locus associations of coronavirus disease 2019 genetic risk loci**

**Chang Yoon Moon, Brian M. Schilder, Towfique Raj, and Kuan-lin Huang**

### Chromosome 3

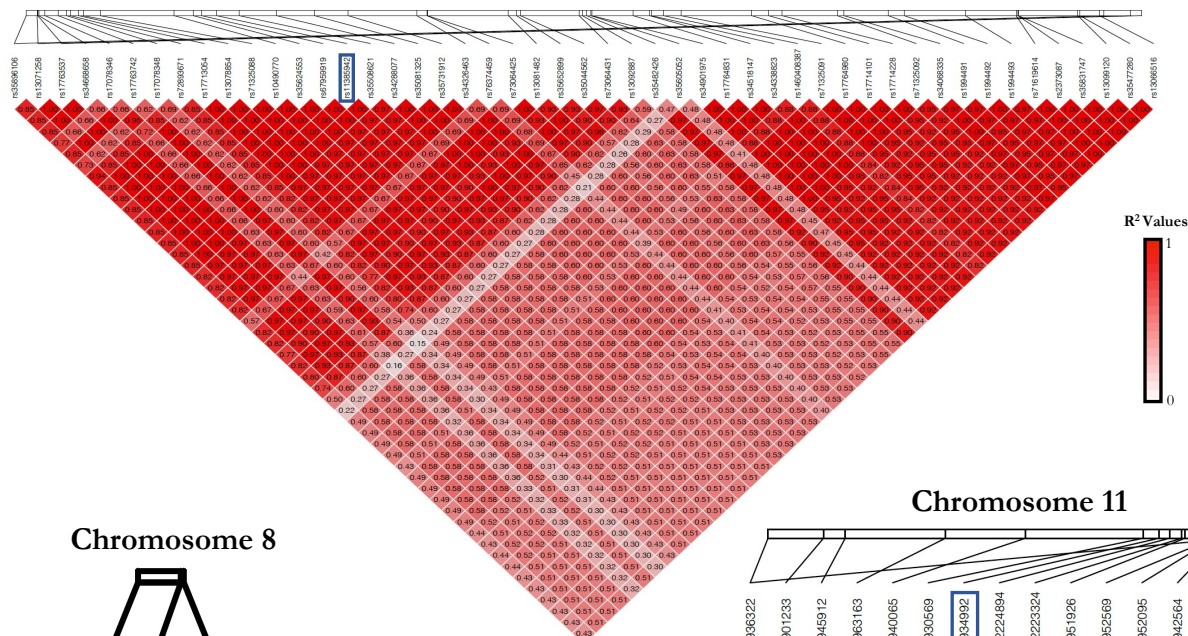

### Chromosome 8

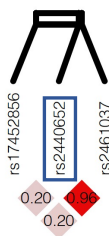

### Chromosome 11

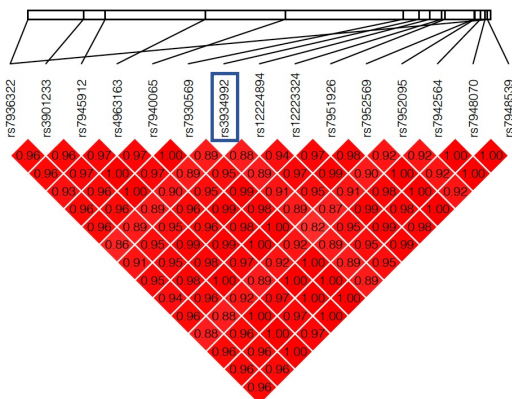

### Chromosome 9

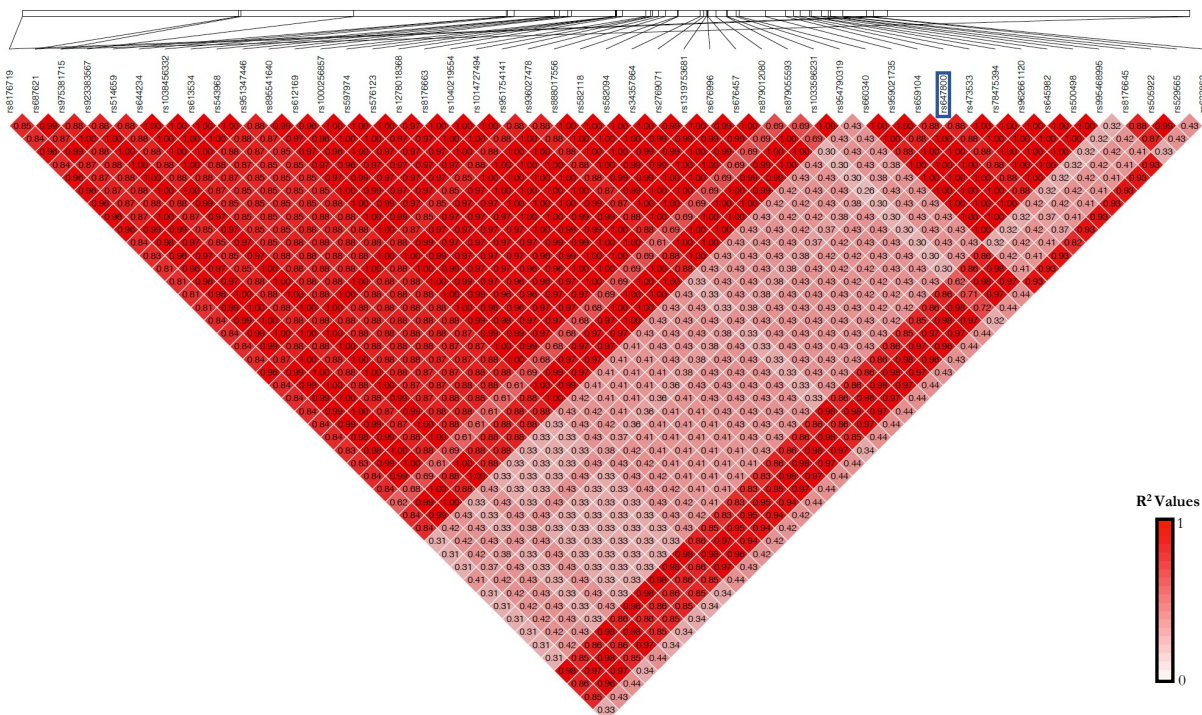

**Supplementary Figure 1 (Related to Figure 1). LD analysis of each replicated SNP and its neighboring variants.** The neighboring variants are defined as GWAS SNPs showing suggestive associations ( $P < 1e-5$ ) from GCST90000256 within  $\pm 100\text{Kb}$  surrounding each replicated SNP. Each square has a numeric value representing  $R^2$  value of each pair of SNPs being tested and is characterized by red color scale with the brightest red representing  $R^2$  value of 1. Each blue rectangle indicates each replicated SNP. A replicated SNP at chromosome 19 (rs12610495) is not shown as there were no neighboring variants ( $P < 1e-5$ ) within the  $\pm 100\text{Kb}$  window

Supplementary Fig. 2

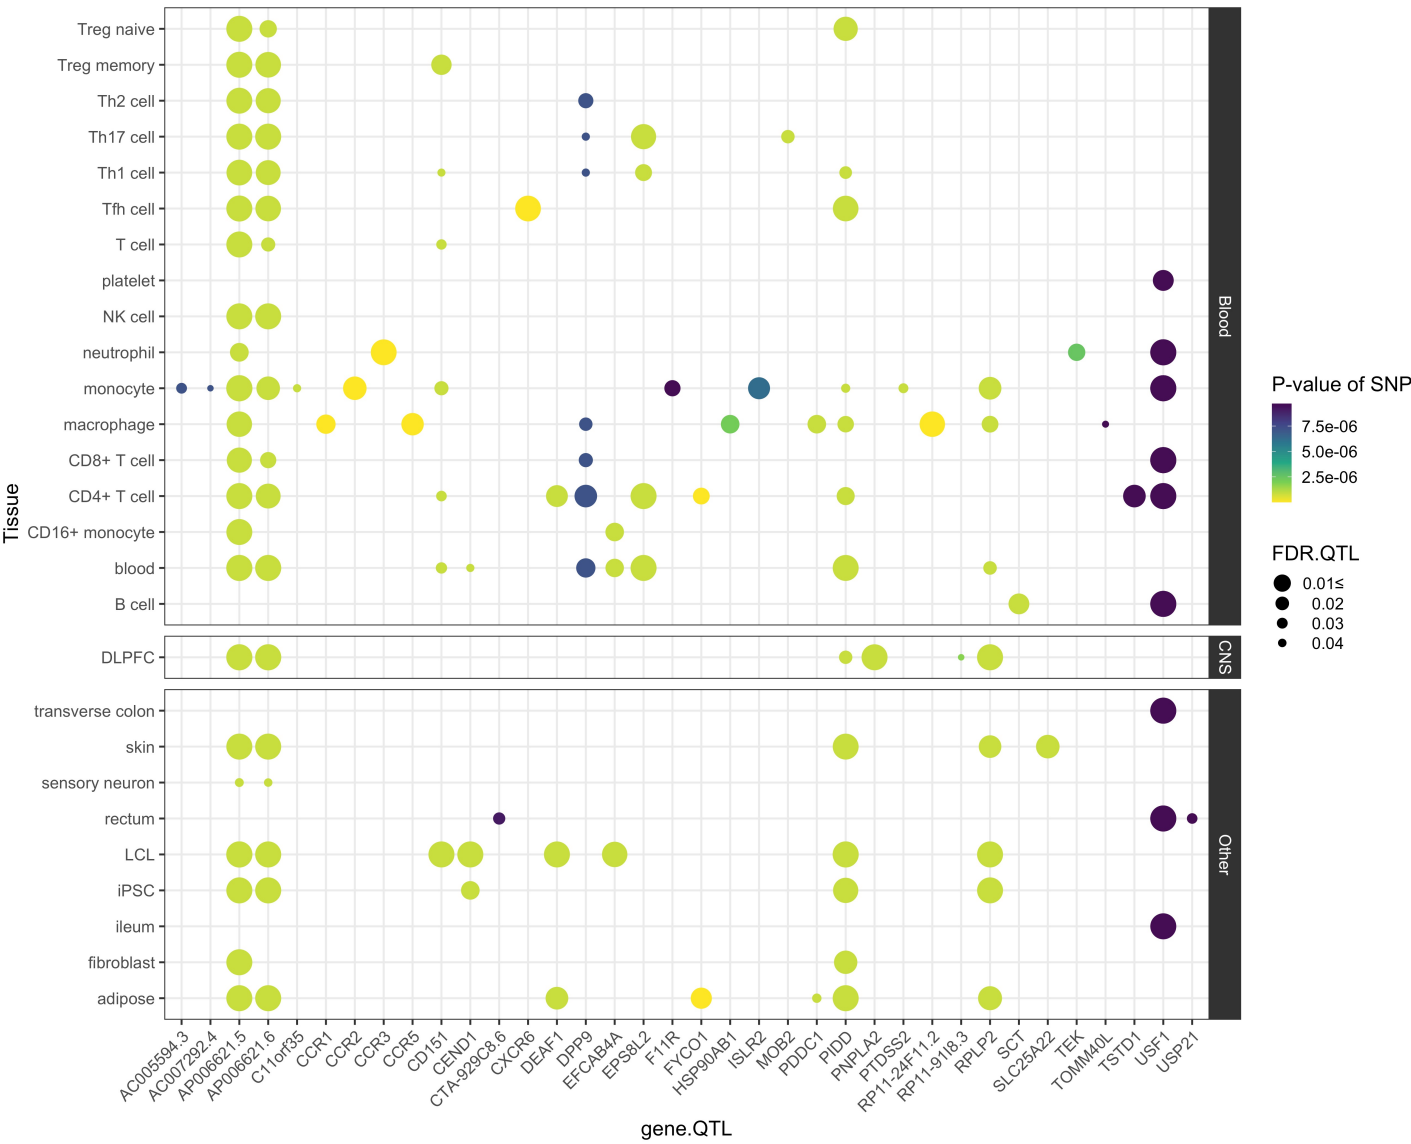

**Supplementary Figure 2 (Related to Figure 3). Significant Immune/Non-immune specific eQTLs associated with lead SNPs.** The eQTLs were compiled from the eQTL Catalogue<sup>13</sup> database and filtered at a Benjamini-Hochberg FDR < 0.05. Point color reflects the significance of that SNP in the COVID-19 GWAS<sup>6</sup> (more yellow = more significant p-values), while point size reflects the significance of the eQTL SNP (larger = more significant FDR). When multiple SNPs overlap within a given gene-tissue combination, the SNP with the lowest p-value/FDR is plotted.

Supplementary Fig. 3

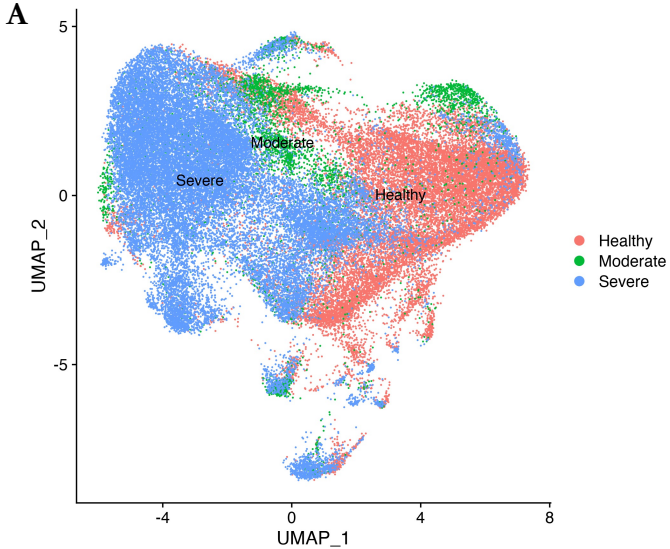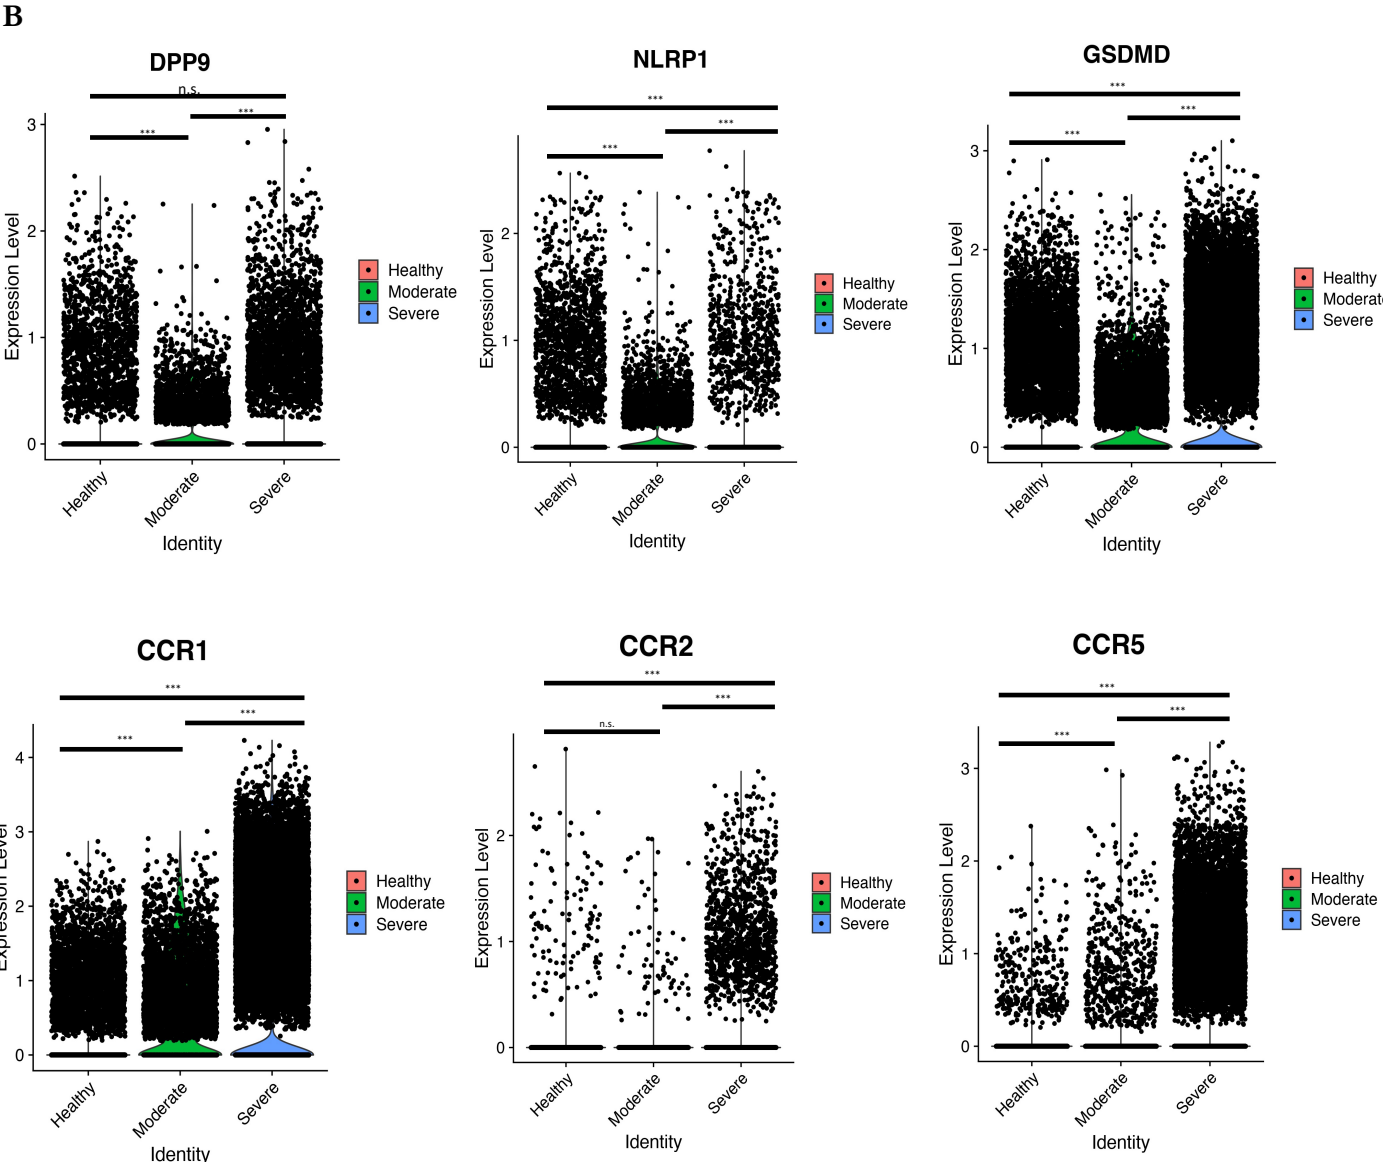

**Supplementary Figure 3 (Related to Figure 3). scRNA-seq of Macrophages From Bronchoalveolar Lavage Fluid of COVID-19 Patients.** A) UMAP plot of integrated macrophage subset from scRNA-seq of bronchoalveolar lavage fluid from COVID-19 patients and controls. Each disease severity is denoted with a color. B) Differential expression of immune genes between monocytes/macrophages of different disease severity groups based on scRNA-seq of bronchoalveolar lavage fluid from COVID-19 patients and healthy controls. \*\*\* indicates Bonferroni adjusted  $P < 0.001$  and n.s. indicates non-significant.

**Supplementary Table 2 (Related to Figure 1).** LD statistics of intra-chromosome lead SNPs

| <b>LD Pairwise Statistics</b>  | <b>D'</b> | <b>R<sup>2</sup></b> |
|--------------------------------|-----------|----------------------|
| chr1 (rs114173811; rs75558547) | 1         | 0.001                |
| chr3 (rs9882319; rs11385942)   | 0.085     | 0                    |
| chr8 (rs76670680; rs2440652)   | 0.34      | 0.003                |
| chr9 (rs576557083; rs647800)   | 0.286     | 0.002                |
| chr11 (rs3934992; rs78243302)  | 0.238     | 0.001                |
| chrX (rs62586074; rs113076449) | 1         | 0                    |
| chrX (rs62586074; rs10126492)  | 0.363     | 0.001                |
| chrX (rs113076449; rs10126492) | 1         | 0.006                |
